# Supplementary material for: Clinical, molecular, metabolic, and immune features associated with oxidative phosphorylation in melanoma brain metastases
Source: PubMed Central journal article supplement (PMC7865080; doi:10.1093/noajnl/vdaa177), 2021-01-06
Supplement: vdaa177_suppl_supplementary_material.pdf [file vdaa177_suppl_supplementary_material.pdf]

# Supplemental Tables and Figures

Tables S1-4

Figures S1-5

**Table S1. Characteristics of Cell Lines.** OCR, oxygen consumption rate. ECAR, extracellular acidification rate.

| <b>Cell Line</b> | <b>Species</b> | <b>Driver Mutations</b>                      | <b>OXPPOS Status</b> | <b>Basal OCR (Ratio to A375)</b> | <b>Basal ECAR (Ratio to A375)</b> |
|------------------|----------------|----------------------------------------------|----------------------|----------------------------------|-----------------------------------|
| <b>A375</b>      | Human          | BRAF <sup>V600E</sup>                        | Low                  | 1.0                              | 1.0                               |
| <b>A375-R1</b>   | Human          | BRAF <sup>V600E</sup> ;MEK1 <sup>F129L</sup> | High                 | 3.1                              | 1.0                               |
| <b>MEL624</b>    | Human          | BRAF <sup>V600E</sup>                        | High                 | 1.8                              | 0.9                               |
| <b>B16-F10</b>   | Mouse          | ---                                          | High                 | 2.7                              | 1.6                               |

**Table S2. Gene Sets Comprising the OXPHOS-Index Signature**

| Gene Set                                                                                                                  | MSigDB Database       |
|---------------------------------------------------------------------------------------------------------------------------|-----------------------|
| HALLMARK_OXIDATIVE_PHOSPHORYLATION                                                                                        | Hallmarks             |
| KEGG_OXIDATIVE_PHOSPHORYLATION                                                                                            | C2: Curated Gene Sets |
| KEGG_CITRATE_CYCLE_TCA_CYCLE                                                                                              | C2: Curated Gene Sets |
| REACTOME_TCA_CYCLE_AND_RESPIRATORY_ELECTRON_TRANSPORT                                                                     | C2: Curated Gene Sets |
| REACTOME_CITRIC_ACID_CYCLE_TCA_CYCLE                                                                                      | C2: Curated Gene Sets |
| REACTOME_RESPIRATORY_ELECTRON_TRANSPORT_ATP_SYNTHESIS_BY_CHEMIOSMOTIC_COUPLING_AND_HEAT_PRODUCTION_BY_UNCOUPLING_PROTEINS | C2: Curated Gene Sets |
| MOOTHA_TCA                                                                                                                | C2: Curated Gene Sets |
| MOOTHA_VOXPPOS                                                                                                            | C2: Curated Gene Sets |
| OPIIndex → arithmetic mean of ssGSEA scores for listed gene sets                                                          |                       |

**Table S3. Comparison in Mutation Proportion Between High- (N=8) and Low- (N=5) OXPHOS MBMs**

| Gene                | P Value  | Gene   | P Value |
|---------------------|----------|--------|---------|
| ABL1                | 1        | KDR    | 1       |
| AKT1                | 1        | KIT    | 1       |
| ALK                 | 1        | MAP2K1 | 1       |
| AR                  | 1        | MAP2K4 | 1       |
| ATM                 | 1        | MAP3K1 | 0.49    |
| ATR                 | 1        | MAP3K4 | 0.49    |
| AURKA               | 1        | MET    | 0.38    |
| BAP1                | 1        | MITF   | 0.38    |
| <b>BRAF.any</b>     | <b>1</b> | MPL    | 1       |
| <b>BRAF.nonV600</b> | <b>1</b> | MTOR   | 1       |
| <b>BRAF.V600</b>    | <b>1</b> | NF1    | 1       |
| BRCA1               | 0.38     | NF2    | 1       |
| BRCA2               | 1        | NOTCH1 | 1       |
| CDK4                | 1        | NOTCH2 | 1       |
| CDK6                | 1        | NOTCH3 | 1       |
| CDKN2A              | 1        | NOTCH4 | 1       |
| CHEK2               | 1        | NRAS   | 0.49    |
| CSF1R               | 1        | PALB2  | 1       |
| DDR1                | 1        | PDGFRA | 0.49    |
| DDR2                | 1        | PDGFRB | 1       |
| DNMT3A              | 1        | PIK3CA | 1       |
| EGFR                | 1        | PIK3R1 | 0.38    |
| ESR1                | 1        | PTCH1  | 1       |
| FGFR1               | 1        | PTEN   | 1       |
| FGFR2               | 1        | PTPN11 | 1       |
| FGFR3               | 0.38     | RB1    | 1       |
| FLT1                | 1        | RET    | 1       |
| FLT4                | 1        | SMO    | 1       |
| GNAQ                | 1        | STK11  | 1       |
| HDAC9               | 1        | SYK    | 0.13    |
| IDH1                | 1        | TET2   | 1       |
| IDH2                | 1        | TP53   | 0.38    |
| IGF1R               | 1        | TSC1   | 1       |
| JAK1                | 1        | TSC2   | 1       |
| JAK3                | 1        |        |         |

**Table S2.** The prevalence of non-synonymous somatic mutations in 74 clinically relevant genes was compared between High- (N=8) and Low- (N=5) OXPHOS MBMs with available WES data. Gene names are listed in bold. The *BRAF* gene results (any mutation, nonV600 mutation, and V600 mutation) is highlighted in red. No genes met the criteria for statistical significance ( $p < 0.05$ ) via Fisher's exact test.

**Table S4. KEGG Metabolism Gene Sets Used in Metabolomics Pathway Analyses**

| Pathway Name                                | Pathway Name                                         |
|---------------------------------------------|------------------------------------------------------|
| GLYCOLYSIS GLUCONEOGENESIS                  | GLYCOSAMINOGLYCAN BIOSYNTHESIS CHONDROITIN SULFATE   |
| CITRATE CYCLE TCA CYCLE                     | GLYCOSAMINOGLYCAN BIOSYNTHESIS KERATAN SULFATE       |
| PENTOSE PHOSPHATE PATHWAY                   | GLYCOSAMINOGLYCAN BIOSYNTHESIS HEPARAN SULFATE       |
| PENTOSE AND GLUCURONATE INTERCONVERSIONS    | GLYCEROLIPID METABOLISM                              |
| FRUCTOSE AND MANNOSE METABOLISM             | INOSITOL PHOSPHATE METABOLISM                        |
| GALACTOSE METABOLISM                        | GLYCOSYLPHOSPHATIDYLINOSITOL GPI ANCHOR BIOSYNTHESIS |
| ASCORBATE AND ALDARATE METABOLISM           | GLYCEROPHOSPHOLIPID METABOLISM                       |
| FATTY ACID METABOLISM                       | ETHER LIPID METABOLISM                               |
| STEROID BIOSYNTHESIS                        | ARACHIDONIC ACID METABOLISM                          |
| PRIMARY BILE ACID BIOSYNTHESIS              | LINOLEIC ACID METABOLISM                             |
| STEROID HORMONE BIOSYNTHESIS                | ALPHA LINOLENIC ACID METABOLISM                      |
| OXIDATIVE PHOSPHORYLATION                   | SPHINGOLIPID METABOLISM                              |
| PURINE METABOLISM                           | GLYCOSPHINGOLIPID BIOSYNTHESIS LACTO/NEOLACTO SERIES |
| PYRIMIDINE METABOLISM                       | GLYCOSPHINGOLIPID BIOSYNTHESIS GLOBO SERIES          |
| ALANINE ASPARTATE AND GLUTAMATE METABOLISM  | GLYCOSPHINGOLIPID BIOSYNTHESIS GANGLIO SERIES        |
| GLYCINE SERINE AND THREONINE METABOLISM     | PYRUVATE METABOLISM                                  |
| CYSTEINE AND METHIONINE METABOLISM          | GLYOXYLATE AND DICARBOXYLATE METABOLISM              |
| VALINE LEUCINE AND ISOLEUCINE DEGRADATION   | PROPANOATE METABOLISM                                |
| VALINE LEUCINE AND ISOLEUCINE BIOSYNTHESIS  | BUTANOATE METABOLISM                                 |
| LYSINE DEGRADATION                          | ONE CARBON POOL BY FOLATE                            |
| ARGININE AND PROLINE METABOLISM             | RIBOFLAVIN METABOLISM                                |
| HISTIDINE METABOLISM                        | NICOTINATE AND NICOTINAMIDE METABOLISM               |
| TYROSINE METABOLISM                         | PANTOTHENATE AND COA BIOSYNTHESIS                    |
| PHENYLALANINE METABOLISM                    | FOLATE BIOSYNTHESIS                                  |
| TRYPTOPHAN METABOLISM                       | RETINOL METABOLISM                                   |
| BETA ALANINE METABOLISM                     | PORPHYRIN AND CHLOROPHYLL METABOLISM                 |
| TAURINE AND HYPOTAURINE METABOLISM          | TERPENOID BACKBONE BIOSYNTHESIS                      |
| SELENOAMINO ACID METABOLISM                 | LIMONENE AND PINENE DEGRADATION                      |
| GLUTATHIONE METABOLISM                      | NITROGEN METABOLISM                                  |
| STARCH AND SUCROSE METABOLISM               | SULFUR METABOLISM                                    |
| N GLYCAN BIOSYNTHESIS                       | AMINOACYL TRNA BIOSYNTHESIS                          |
| OTHER GLYCAN DEGRADATION                    | METABOLISM OF XENOBIOTICS BY CYTOCHROME P450         |
| O GLYCAN BIOSYNTHESIS                       | DRUG METABOLISM CYTOCHROME P450                      |
| AMINO SUGAR AND NUCLEOTIDE SUGAR METABOLISM | DRUG METABOLISM OTHER ENZYMES                        |
| GLYCOSAMINOGLYCAN DEGRADATION               | BIOSYNTHESIS OF UNSATURATED FATTY ACIDS              |

Figure S1

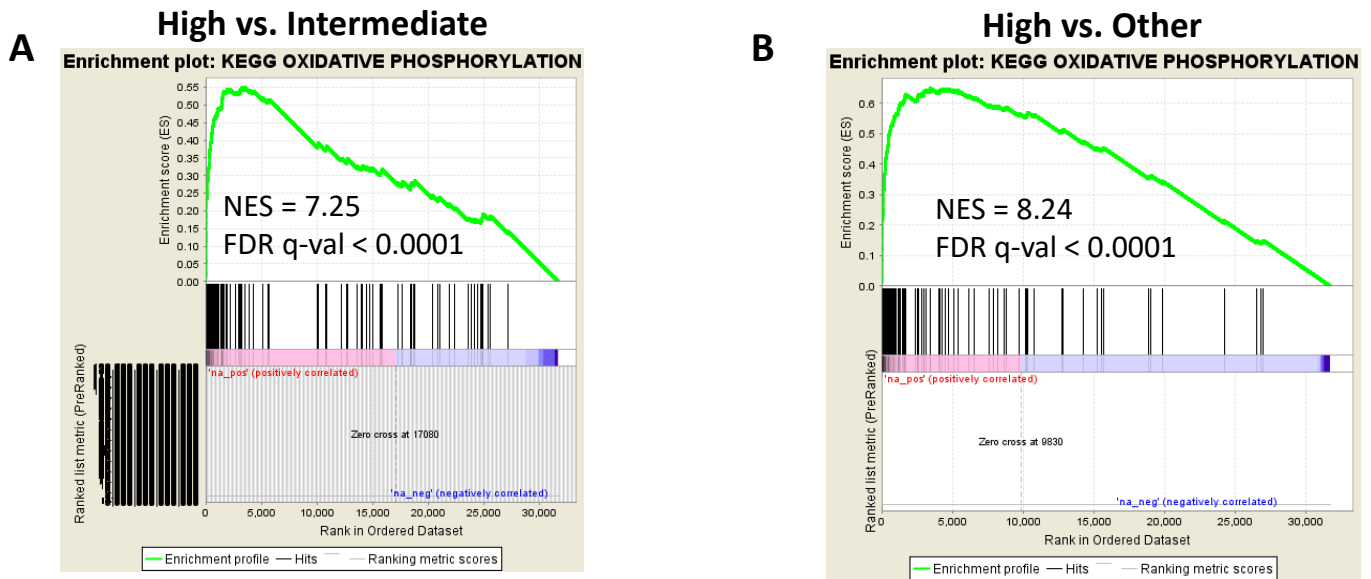

**Figure S1. Pathway analysis of MBMs clustered by OXPPOS gene set expression. (A)** Preranked Gene Set Enrichment Analysis (GSEA-P) demonstrating enrichment of OXPPOS in MBMs identified as “High-OXPPOS MBMs” vs. “Intermediate-OXPPOS MBMs.” **(B)** GSEA-P demonstrating enrichment of OXPPOS in “High-OXPPOS MBMs” vs. all other MBMs. **(A-B)** Normalized enrichment score (NES) and FDR q-val are listed on the enrichment plots.

Figure S2

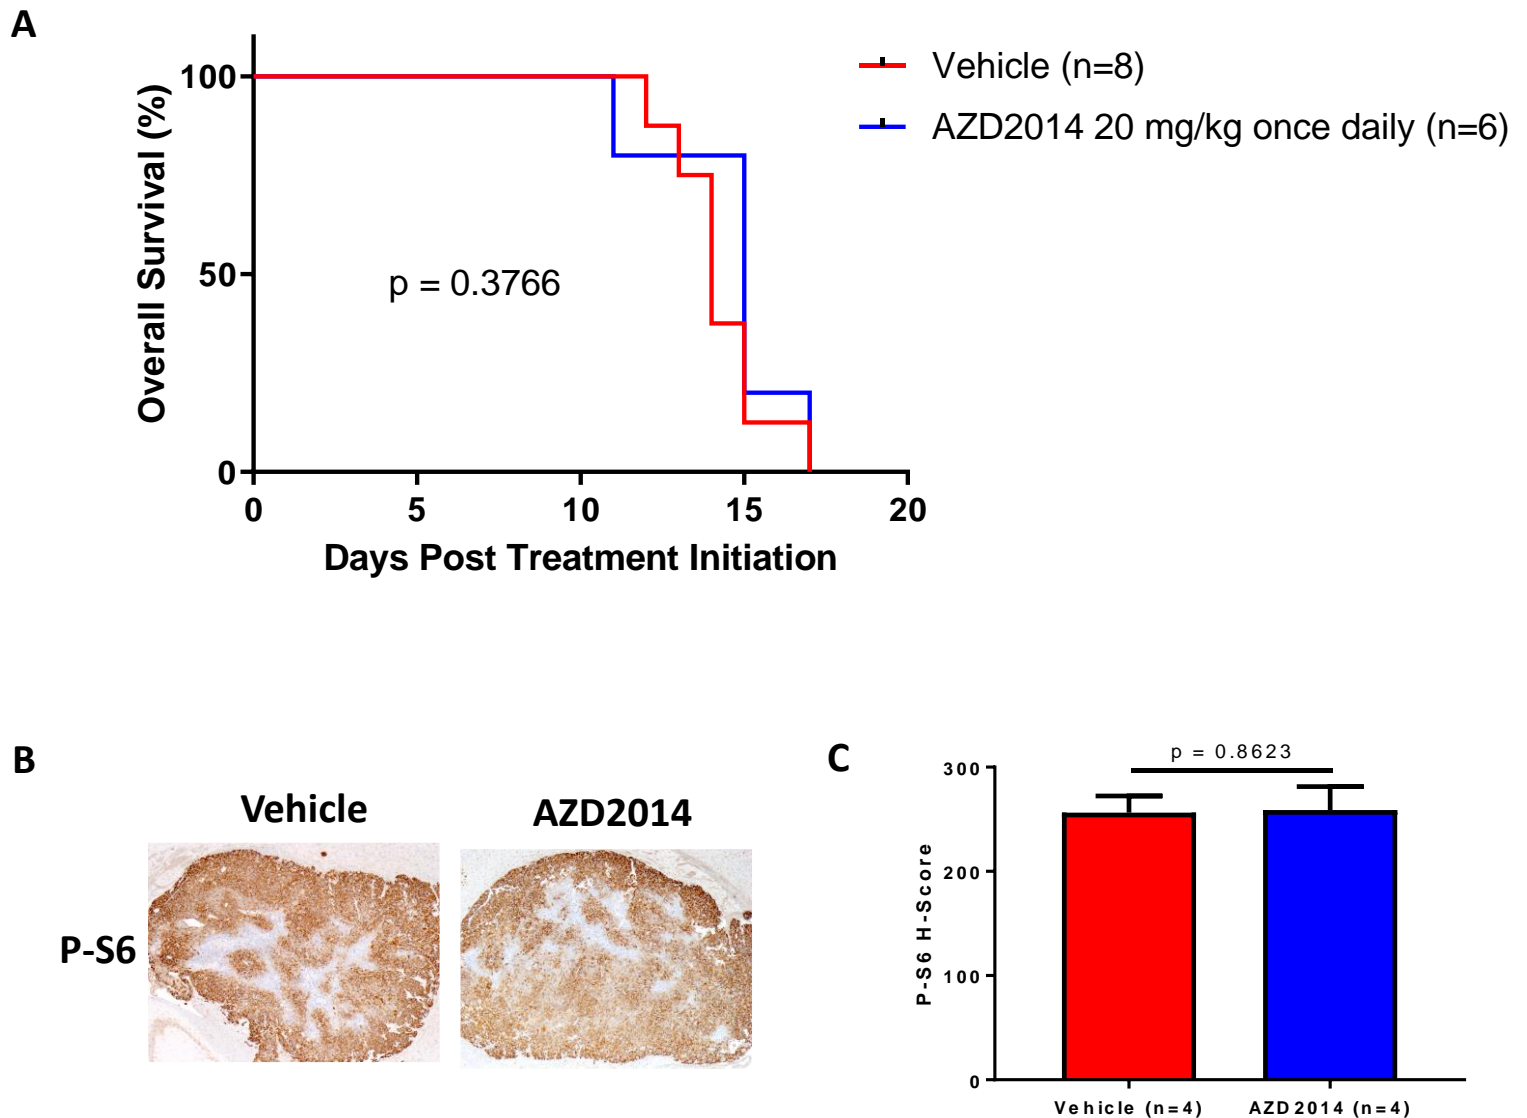

**Figure S2: Pharmacodynamics of AZD2014 in High-OXPPOS, MAPKi-resistant intracranial melanoma xenografts.** (A) Kaplan-Meier analysis of overall survival (OS) of mice bearing intracranial (ICr) A375-R1 xenografts treated with either AZD2014 (20 mg/kg p.o. once daily; Blue line) or vehicle (Red line). Significance was determined by log-rank testing. (B) Representative P-S6 staining of ICr A375-R1 xenografts treated for 1 week with AZD2014 (20 mg/kg p.o. once daily) or vehicle. (C) Average H-scores for P-S6 staining analysis of ICr A375-R1 xenografts treated for 1 week with either AZD2014 (20 mg/kg p.o. once daily) or vehicle. Average values and S.D. of four biological replicates per condition are displayed. Significance determined by two-sided Student's *t*-test.

Figure S3

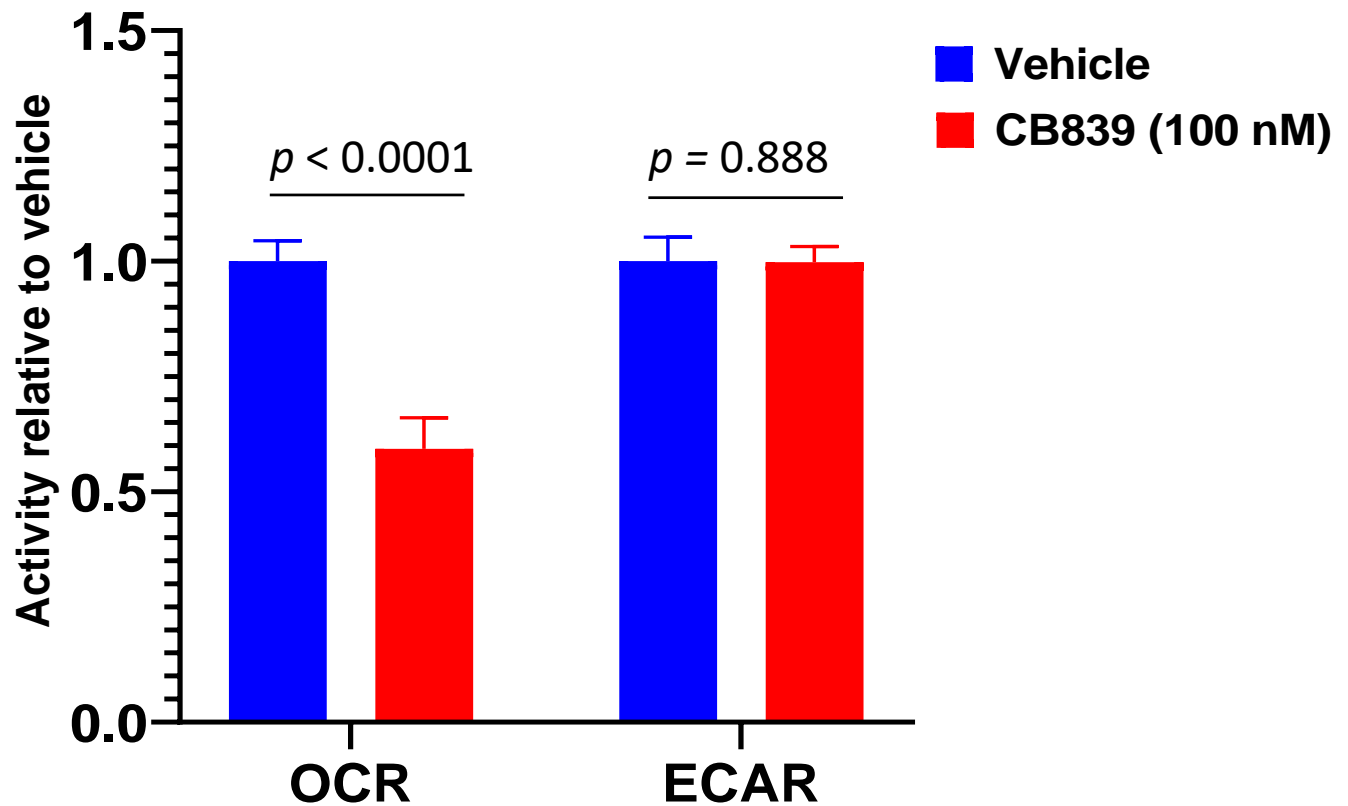

**Figure S3. Effects of CB839 on oxidative phosphorylation and glycolysis in High-OXPHOS A375-R1 cells *in vitro*.** A375-R1 human melanoma cell lines were treated 12 hours with vehicle (*Blue*) or CB-839 100 nM (*Red*) *in vitro*. Seahorse Bioanalyzer analysis was performed to assess basal oxygen consumption rate (OCR) and extracellular acidification rate (ECAR). OCR and ECAR were normalized to average value for vehicle-treated cells. Bars show average of biological replicates (n=12), error bars show standard deviation, significance determined by Student's t-test. Treatment with CB839 significantly reduced OCR (oxidative phosphorylation) but not glycolysis (ECAR) in the High-OXPHOS A375-R1.



Figure S4

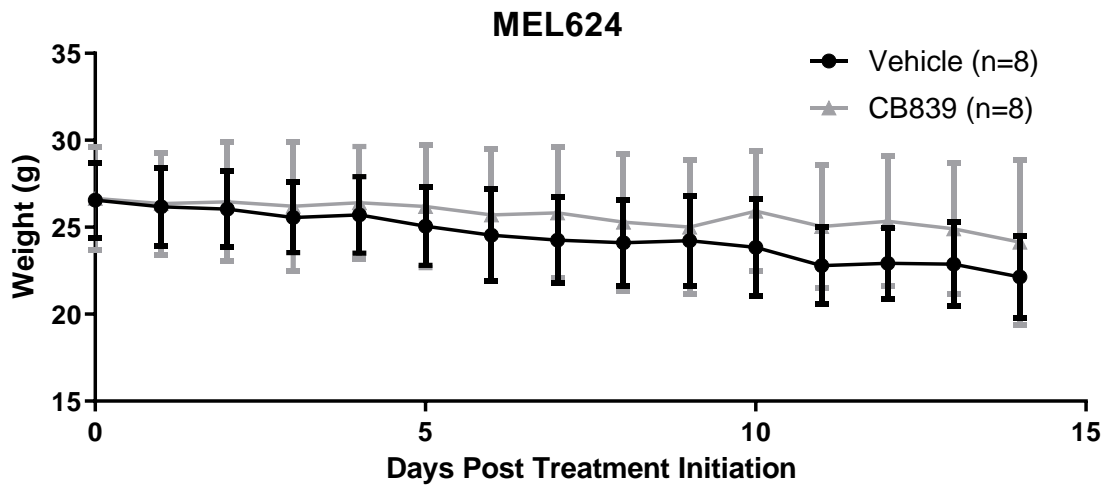

**Figure S4. Tolerability of the glutaminase inhibitor CB839 in mice bearing intracranial High-OXPPOS, MAPKi-resistant melanoma xenografts.** Assessment of body weight for mice bearing intracranial MEL624 xenografts and treated with vehicle or CB839 (200 mg/kg p.o. twice daily). Mice were weighed every 2 days throughout the experiment. Weights for the first 14 days of treatment are displayed. Values represent mean  $\pm$  S.D.

Figure S5

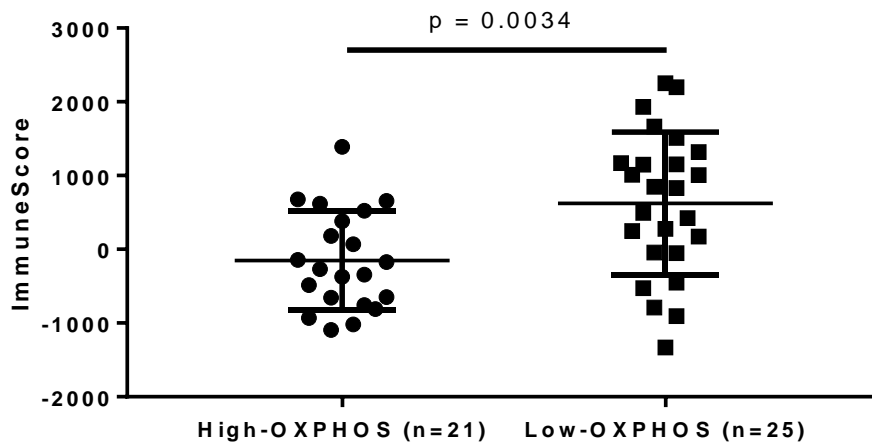

**Figure S5. Association of OXPPOS with ESTIMATE ImmuneScore output.** ESTIMATE ImmuneScore analysis of High-OXPPOS (n=21) and Low-OXPPOS (n=25) MBMs. Lines represent mean  $\pm$  S.D., and each dot represents a single tumor. Significance determined by two-sided Student's *t*-test.
